# Supplementary material for: ANLN truncation causes a familial fatal acute respiratory distress syndrome in Dalmatian dogs
Source: PLoS Genet. 2017 Feb 21;13(2):e1006625. doi: 10.1371/journal.pgen.1006625 (PMC5340406; doi:10.1371/journal.pgen.1006625)
Supplement: S3 Table — (XLSX) [file pgen.1006625.s003.xlsx]

## Sheet: Sheet1
Gene	Amplified region	Forward primer sequence	Reverse primer sequence	Product size (bp)	Ta (⁰C)
ANLN	chr14:47812046-47812214	ATGGCAGTTGGTGATTTTGG	CATAGACCTTGCTGCTGCTG	169	57
ANLN	chr14:47812099-47812190	GCTTGTCTTTTAACACTGCTCT	CCTCTCGGCCATCTTTCTCT	92	57
MUC5B	chr18:45539034-45539205	GAGTCCTGGACCCTGTCAGA	GCTTACACTCGCACTCGAAG	172	57
OR16D05	chr18:40065847-40066139	TAGTTCCCATTTGCACACCC	ATGCTCCAATGGCAAACTGG	293	64
OR08C02	chr18:41554933-41555171	TGTCACAGGGCTCTTCTCTG	CCAGGGACAGGTAGCTAAGG	239	64
GANAB	chr18:54012200-54012417	TCAGTCTGCTCTGGCACAAC	CAGCCTCTCCCTCAATTCTG	218	57
CD302	chr36:5562328-5562642	CAGAAGCTACCTGGAACGG	CAACACCCAGAAACGGATCC	315	66
Ta refers to the used annealing temperature
